# Supplementary material for: Insights into the catalytic potential of a rationally designed magnetic boron nitride nanosheet supported nickel catalyst for the efficient synthesis of 1,4-dihydropyridines
Source: Royal Society of Chemistry journal article supplement (doi:10.1039/d2re00246a), 2022-10-14

## **Insights into the catalytic potential of rationally designed magnetic boron nitride nanosheets supported nickel catalyst for the efficient synthesis of 1,4-dihydropyridines**

Pooja Rana,<sup>a</sup> Ranjana Dixit,<sup>a</sup> Shivani Sharma,<sup>a</sup> Sriparna Dutta,<sup>a</sup> Sneha Yadav,<sup>a</sup> Bhavya Arora,<sup>a</sup> Priyanka,<sup>a</sup> Bhawna Kaushik,<sup>a</sup> Manoj B. Gawande<sup>b</sup> and Rakesh K. Sharma<sup>\*a</sup>

<sup>a</sup>Green Chemistry Network Centre, Department of Chemistry, University of Delhi, New Delhi 110007, India. E-mail: rksharmagreenchem@hotmail.com; Fax: +91-011-27666250; Tel: 011-276666250

<sup>b</sup>Department of Industrial and Engineering Chemistry, Institute of Chemical Technology Mumbai-Marathwada Campus, Jalna, 431213, Maharashtra, India. E-mail: mb.gawande@marj.ictmumbai.edu.in

## Recyclability test

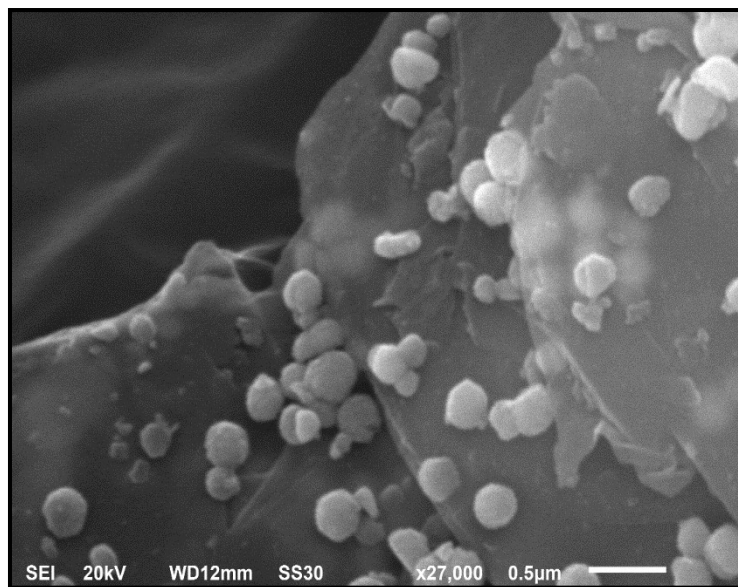

**Fig. S1** SEM image of the recovered  $h\text{-BN@Fe}_3\text{O}_4\text{@APTES@TPC@Ni}$  catalyst.

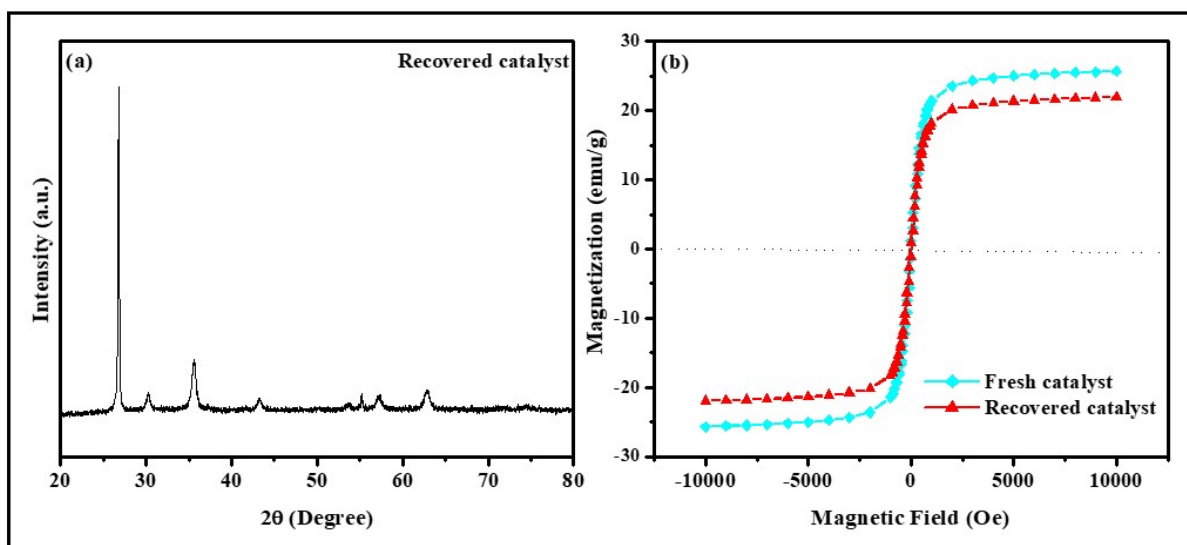

**Fig. S2** (a) XRD and (b) VSM of recovered  $h\text{-BN@Fe}_3\text{O}_4\text{@APTES@TPC@Ni}$ .

## $^1\text{H}$ and $^{13}\text{C}$ NMR spectra of 1,4-dihydropyridines (4a-4h)

$^1\text{H}$  spectrum of Ethyl 2,7,7-trimethyl-5-oxo-4-phenyl-1,4,5,6,7,8-hexahydroquinoline-3-carboxylate (4a)

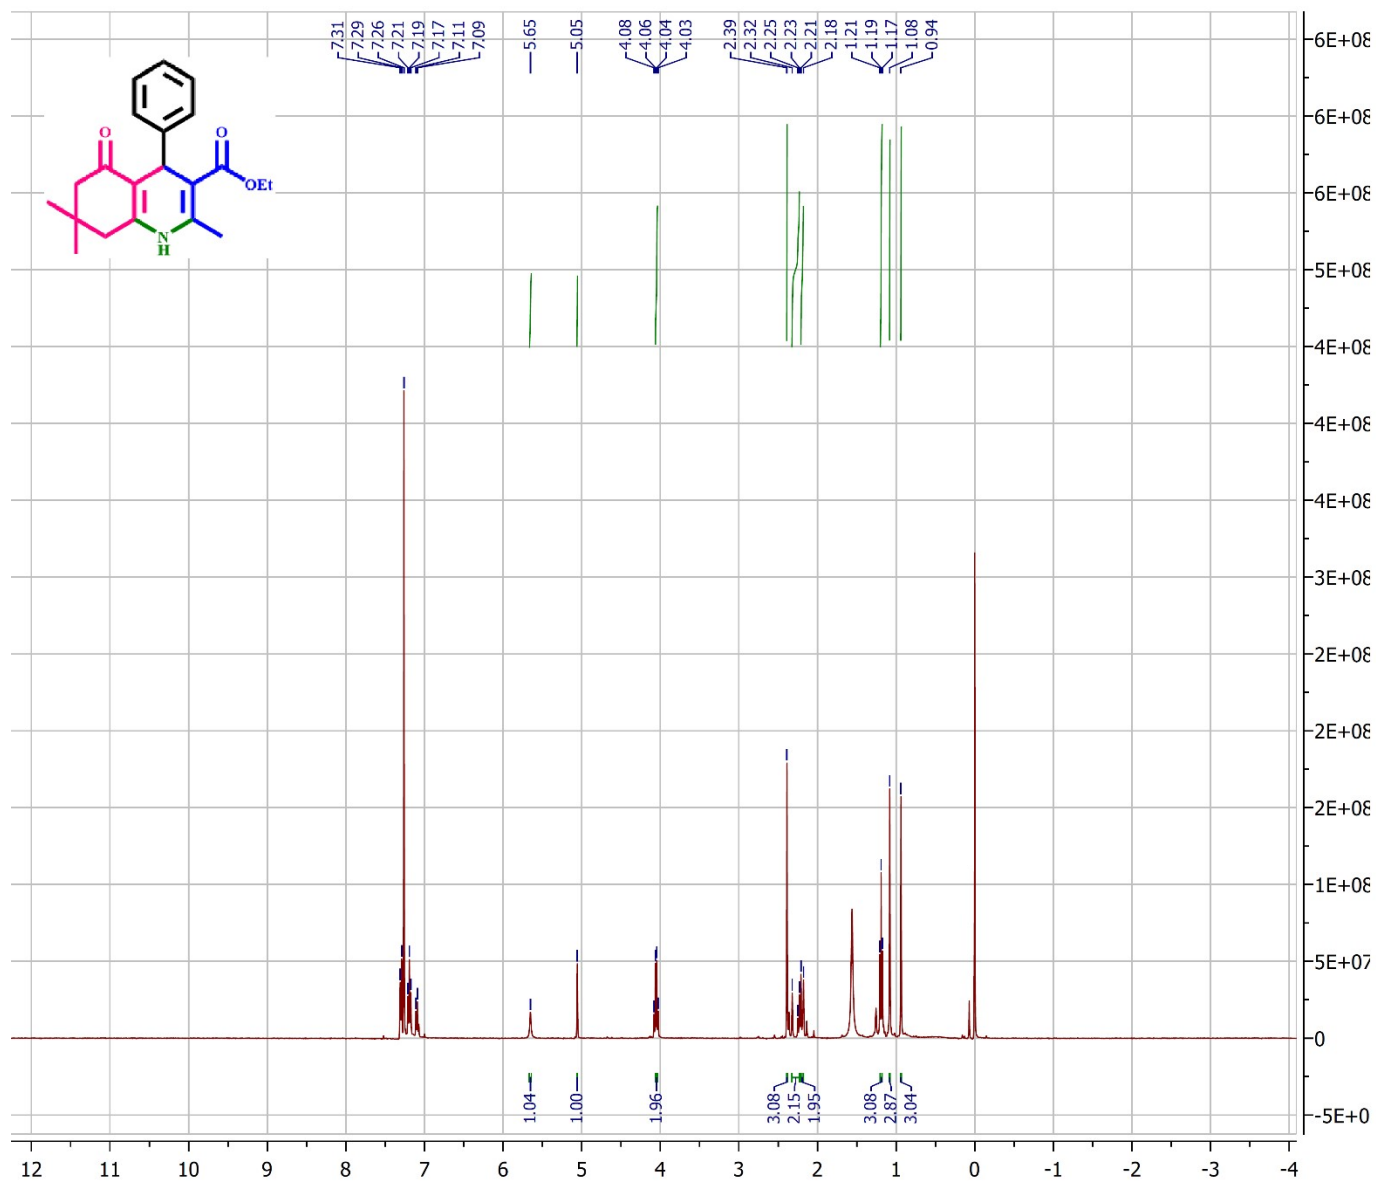

<sup>13</sup>C spectrum of Ethyl 2,7,7-trimethyl-5-oxo-4-phenyl-1,4,5,6,7,8-hexahydroquinoline-3-carboxylate (4a)

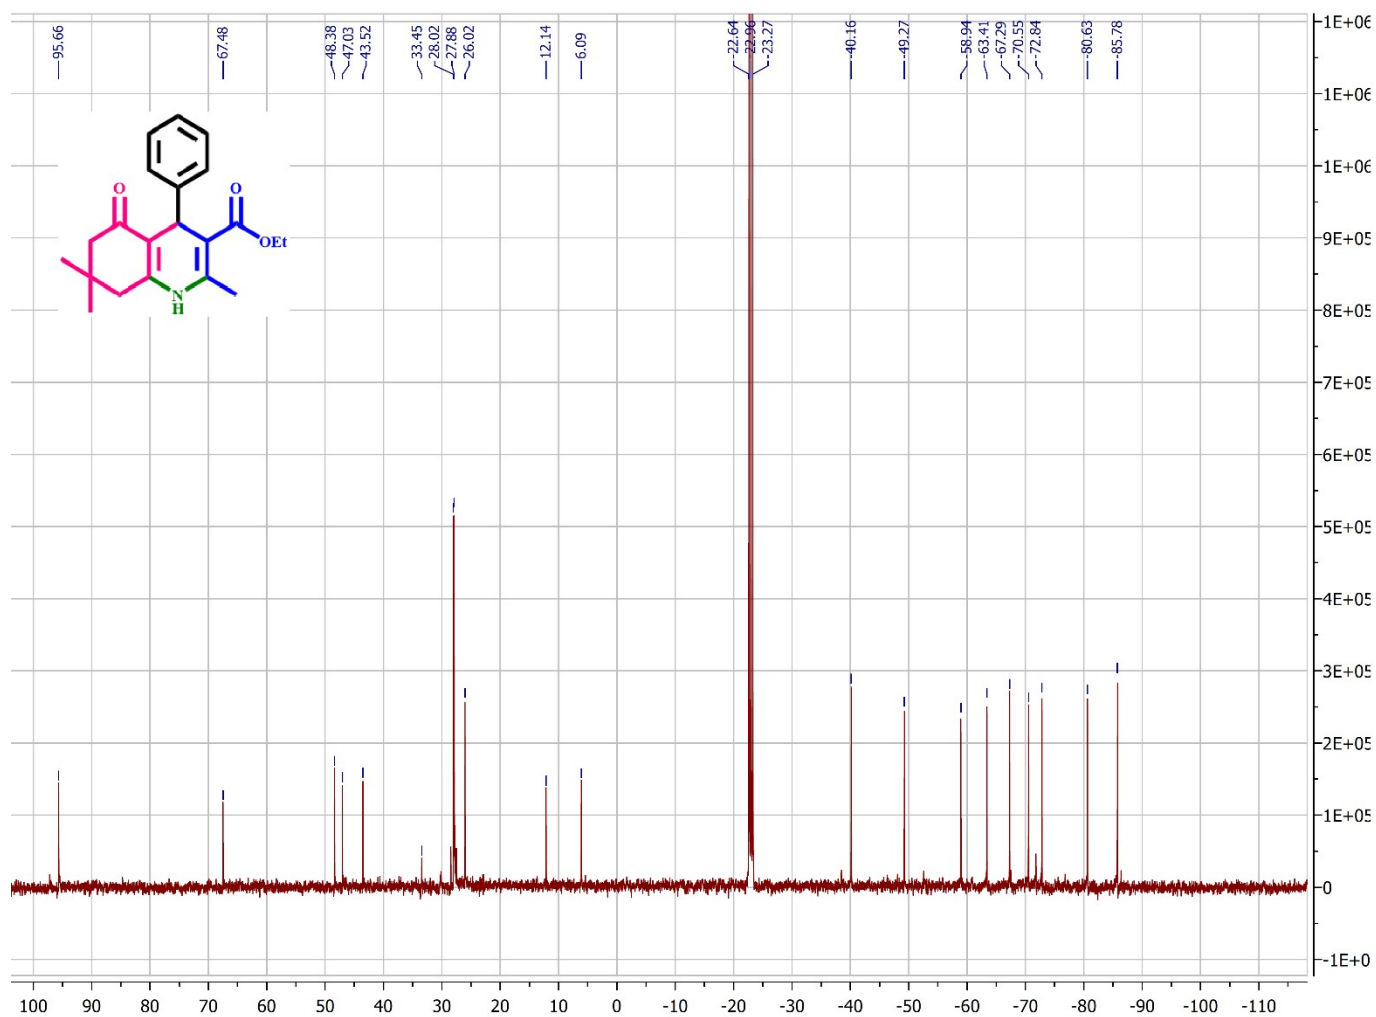

<sup>1</sup>H spectrum of Ethyl 4-(4-chlorophenyl)-2,7,7-trimethyl-5-oxo-1,4,5,6,7,8-hexahydroquinoline-3-carboxylate (4b)

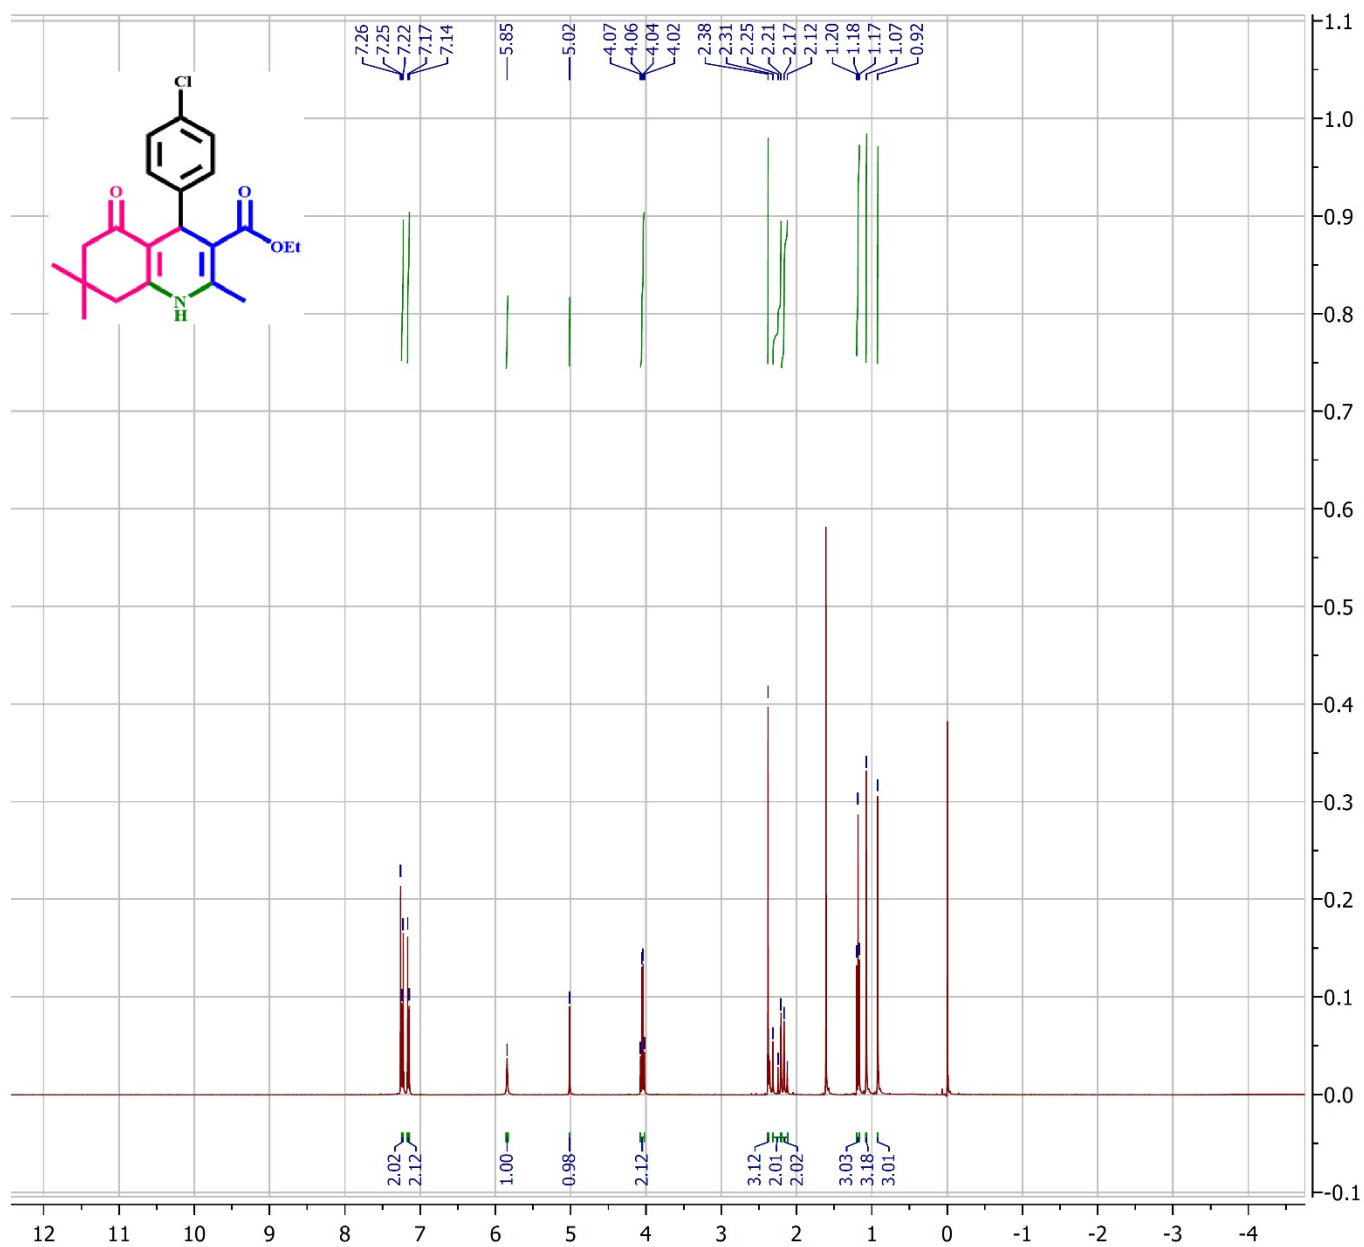

<sup>13</sup>C spectrum of Ethyl 4-(4-chlorophenyl)-2,7,7-trimethyl-5-oxo-1,4,5,6,7,8-hexahydroquinoline-3-carboxylate (4b)

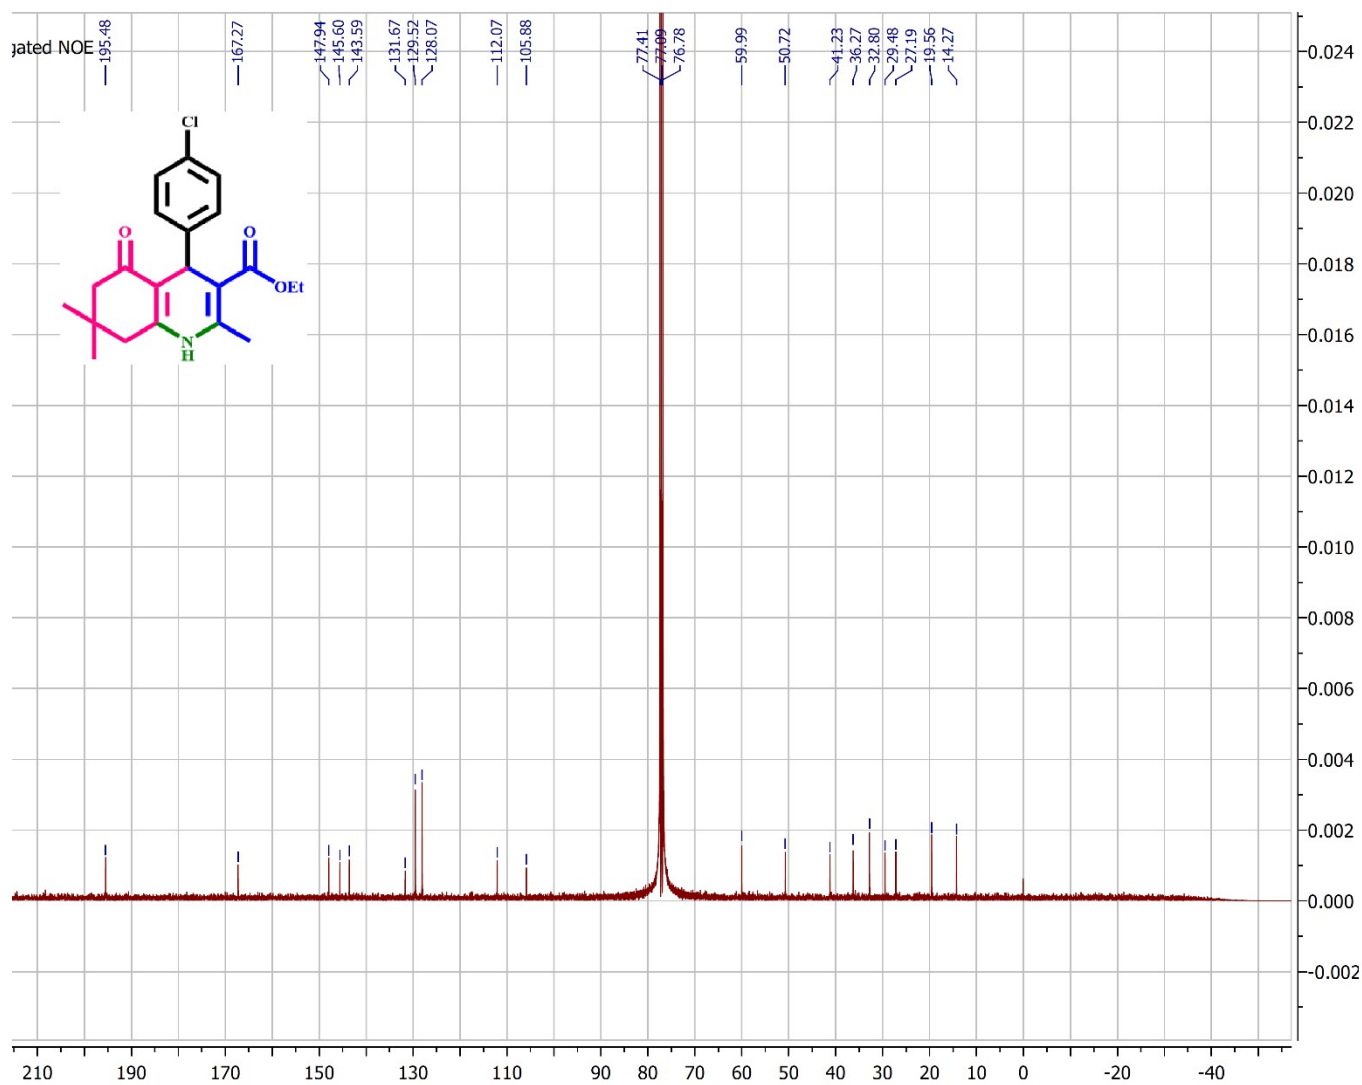

<sup>1</sup>H spectrum of Ethyl 4-(4-bromophenyl)-2,7,7-trimethyl-5-oxo-1,4,5,6,7,8-hexahydroquinoline-3-carboxylate (4c)

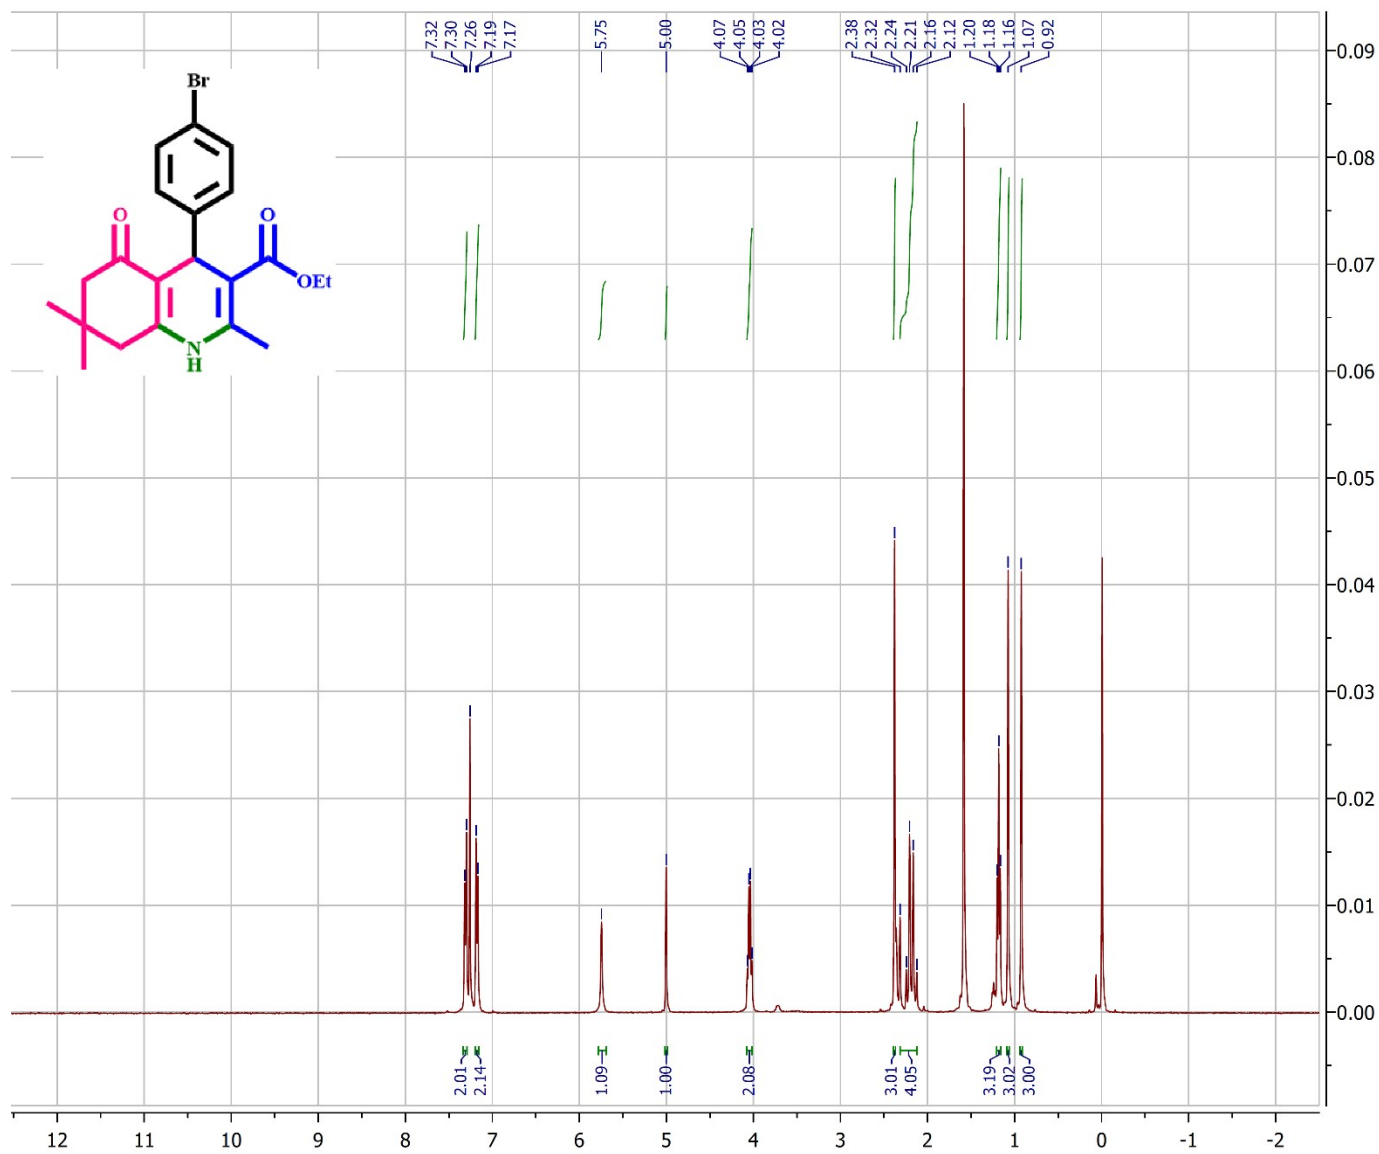

<sup>1</sup>H spectrum of Ethyl 4-(4-cyanophenyl)-2,7,7-trimethyl-5-oxo-1,4,5,6,7,8-hexahydroquinoline-3-carboxylate (4d)

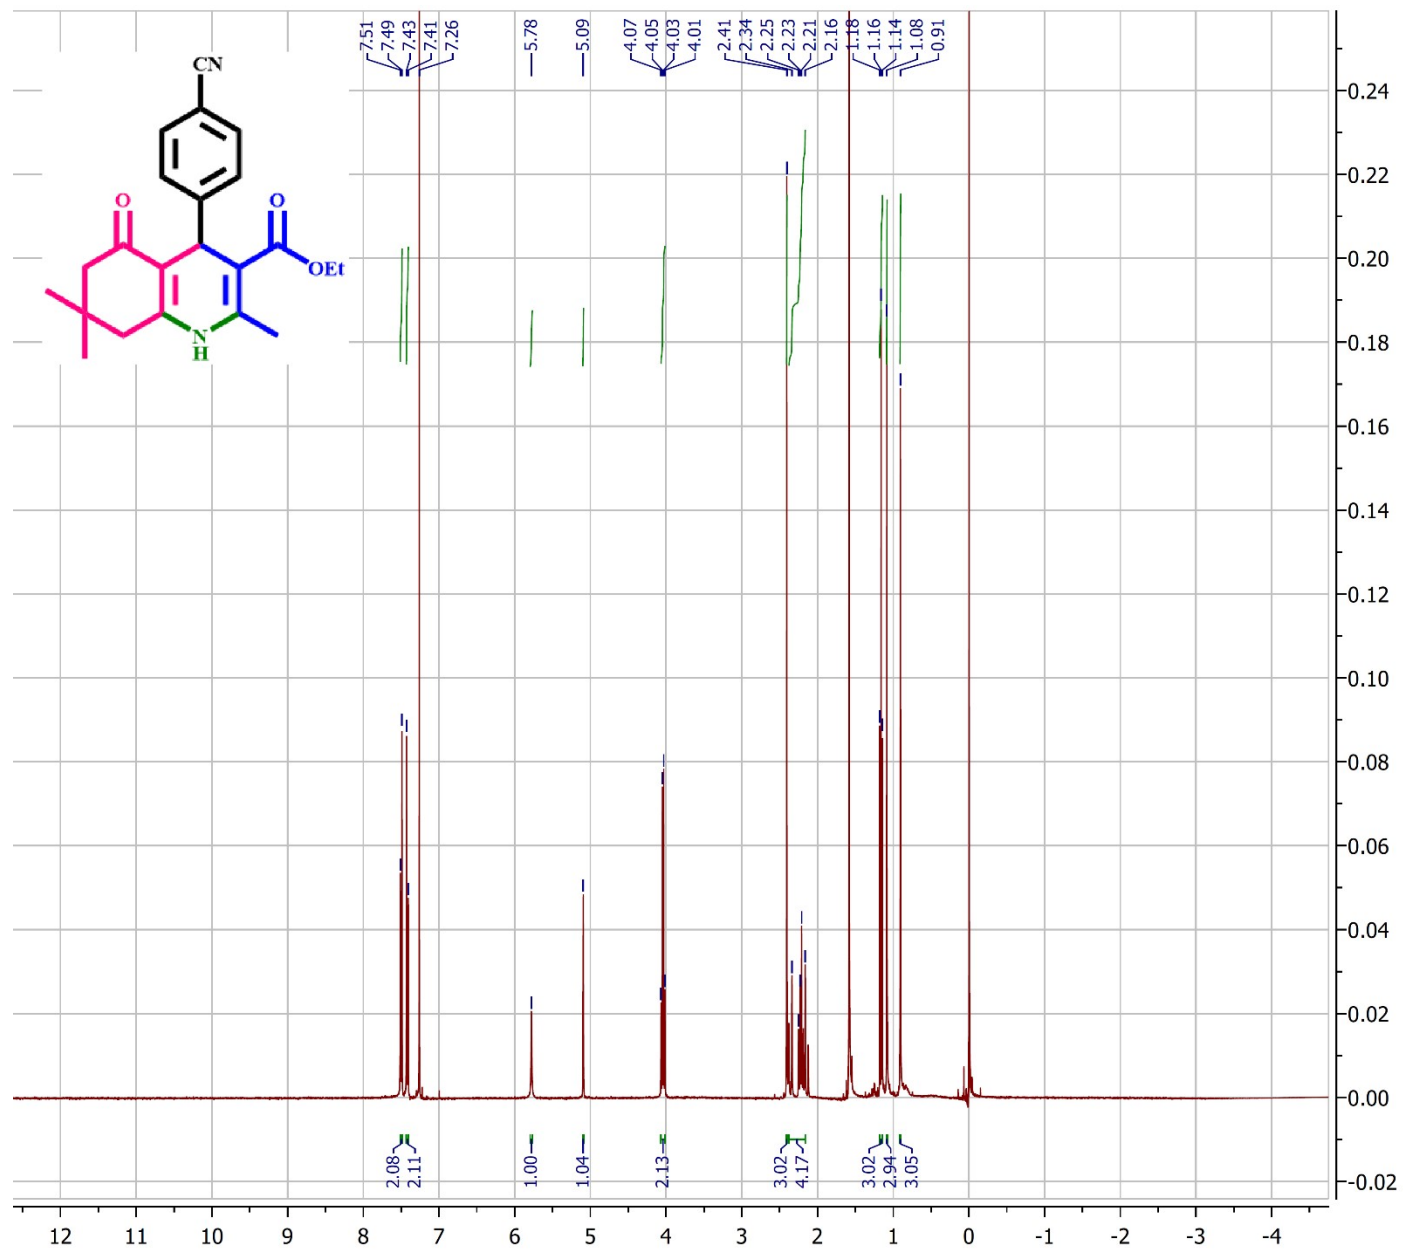



<sup>1</sup>H spectrum of Ethyl 2,7,7-trimethyl-4-(3-bromophenyl)-5-oxo-1,4,5,6,7,8-hexahydroquinoline-3-carboxylate (4e)

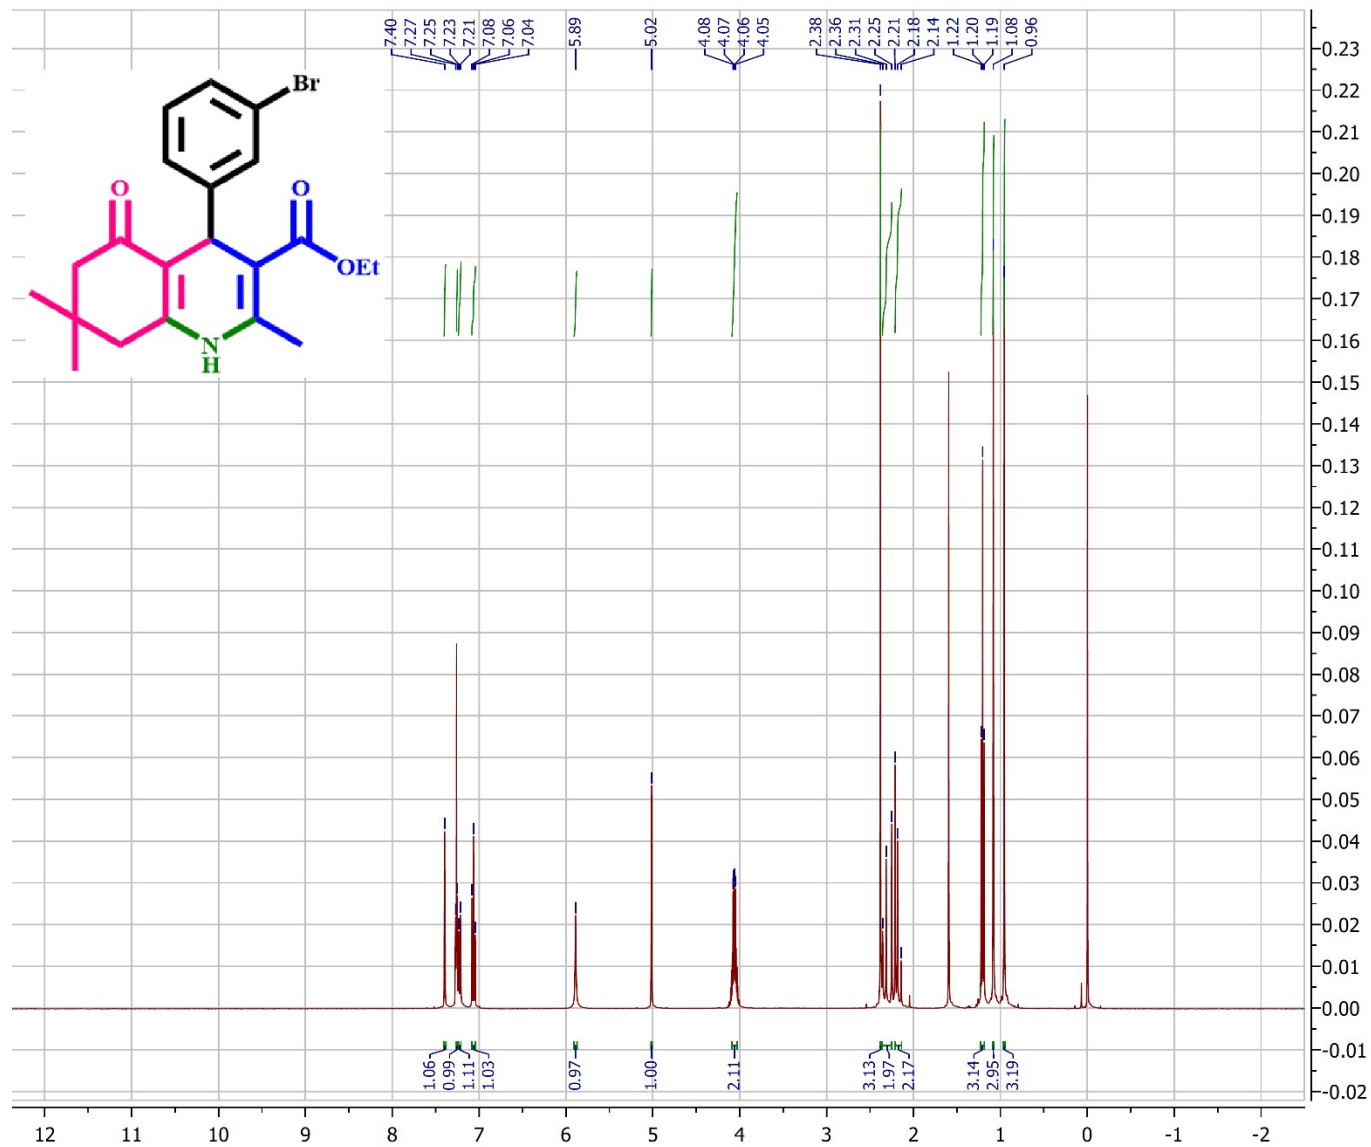

<sup>13</sup>C spectrum of Ethyl 2,7,7-trimethyl-4-(3-bromophenyl)-5-oxo-1,4,5,6,7,8-hexahydroquinoline-3-carboxylate (4e)

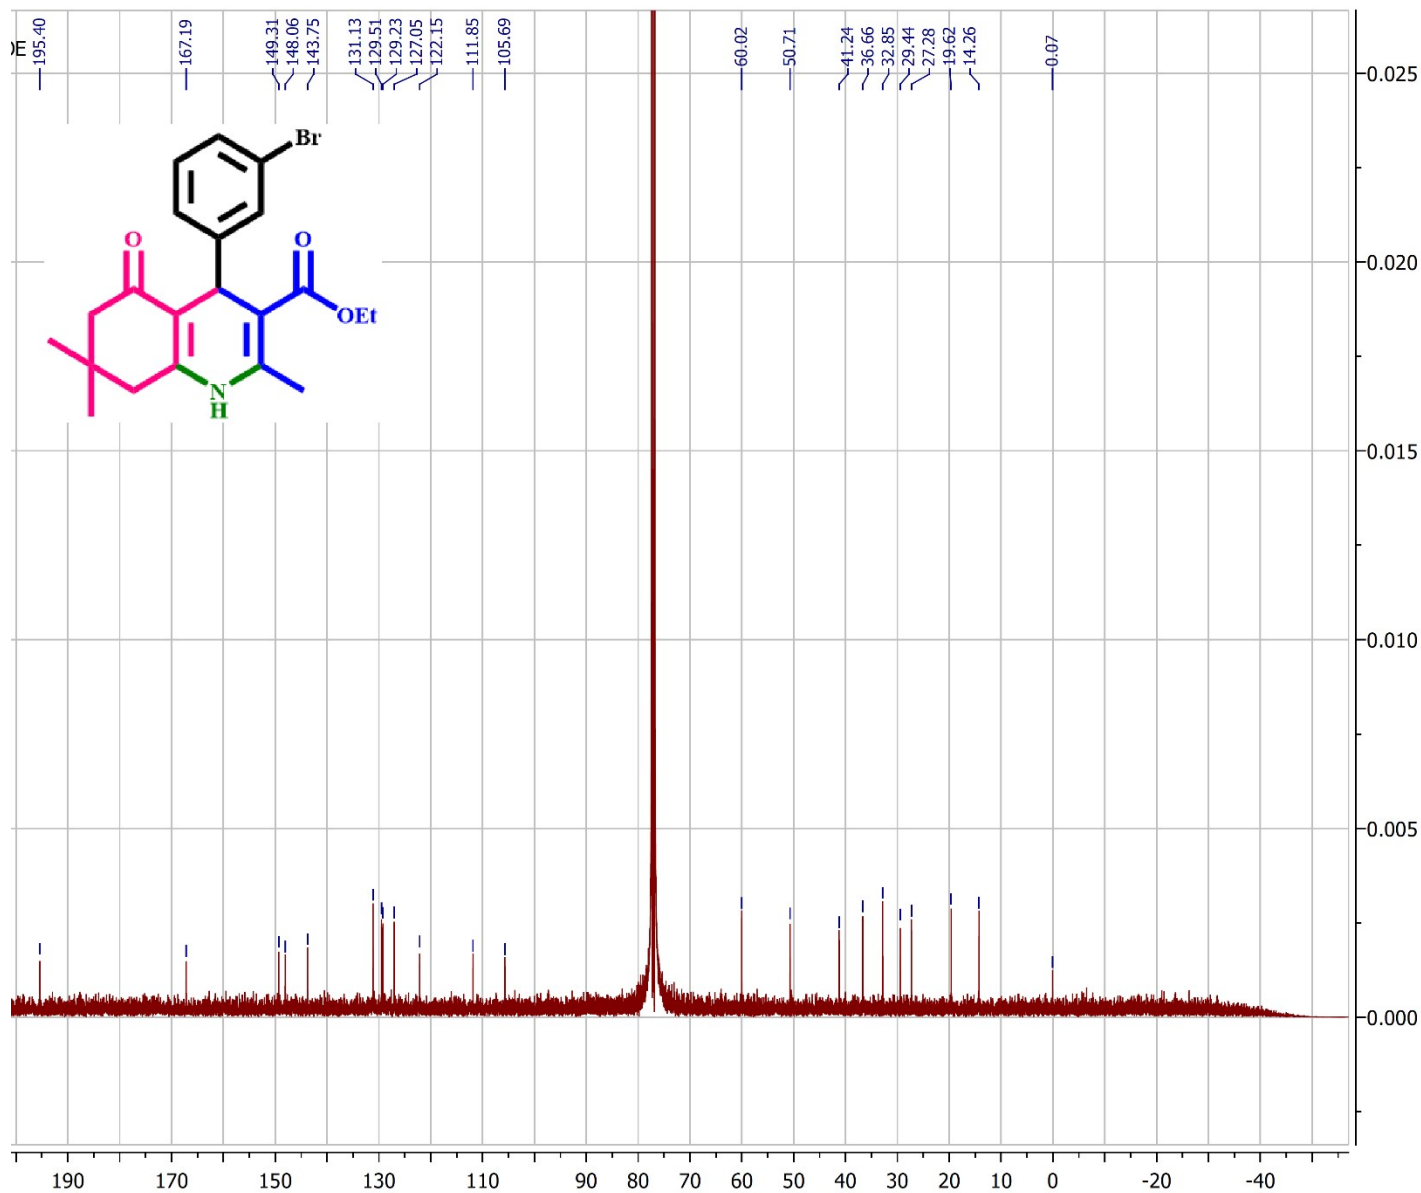

<sup>1</sup>H spectrum of Ethyl 2,7,7-trimethyl-4-(3-chlorophenyl)-5-oxo-1,4,5,6,7,8-hexahydroquinoline-3-carboxylate (4f)

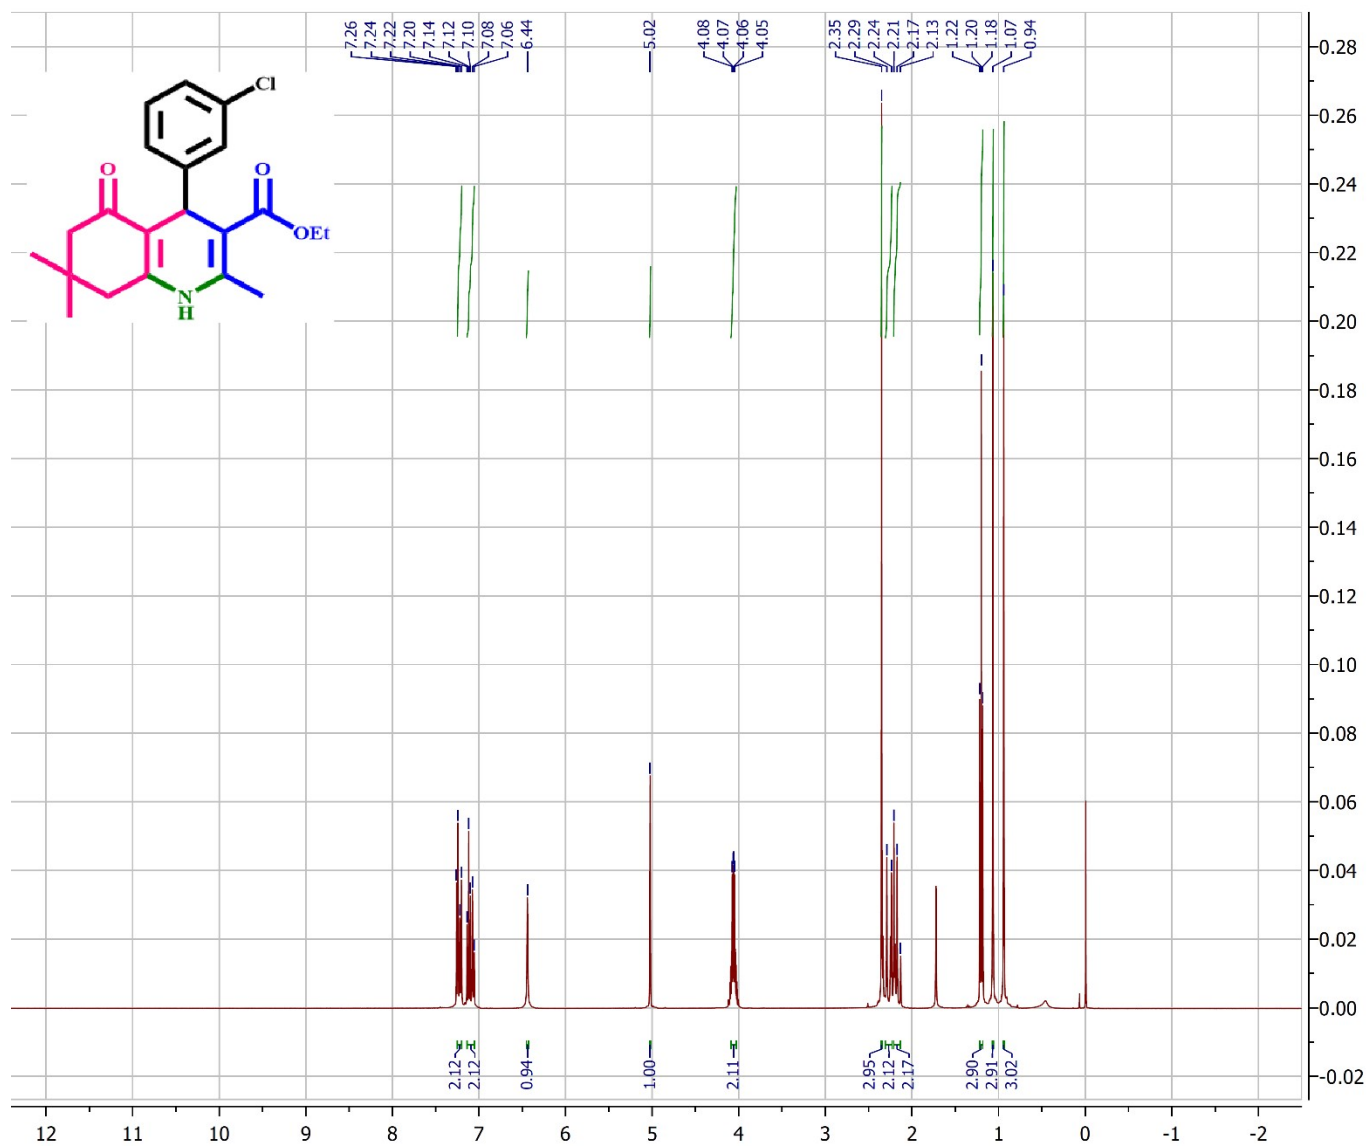

<sup>13</sup>C spectrum of Ethyl 2,7,7-trimethyl-4-(3-chlorophenyl)-5-oxo-1,4,5,6,7,8-hexahydroquinoline-3-carboxylate (4f)

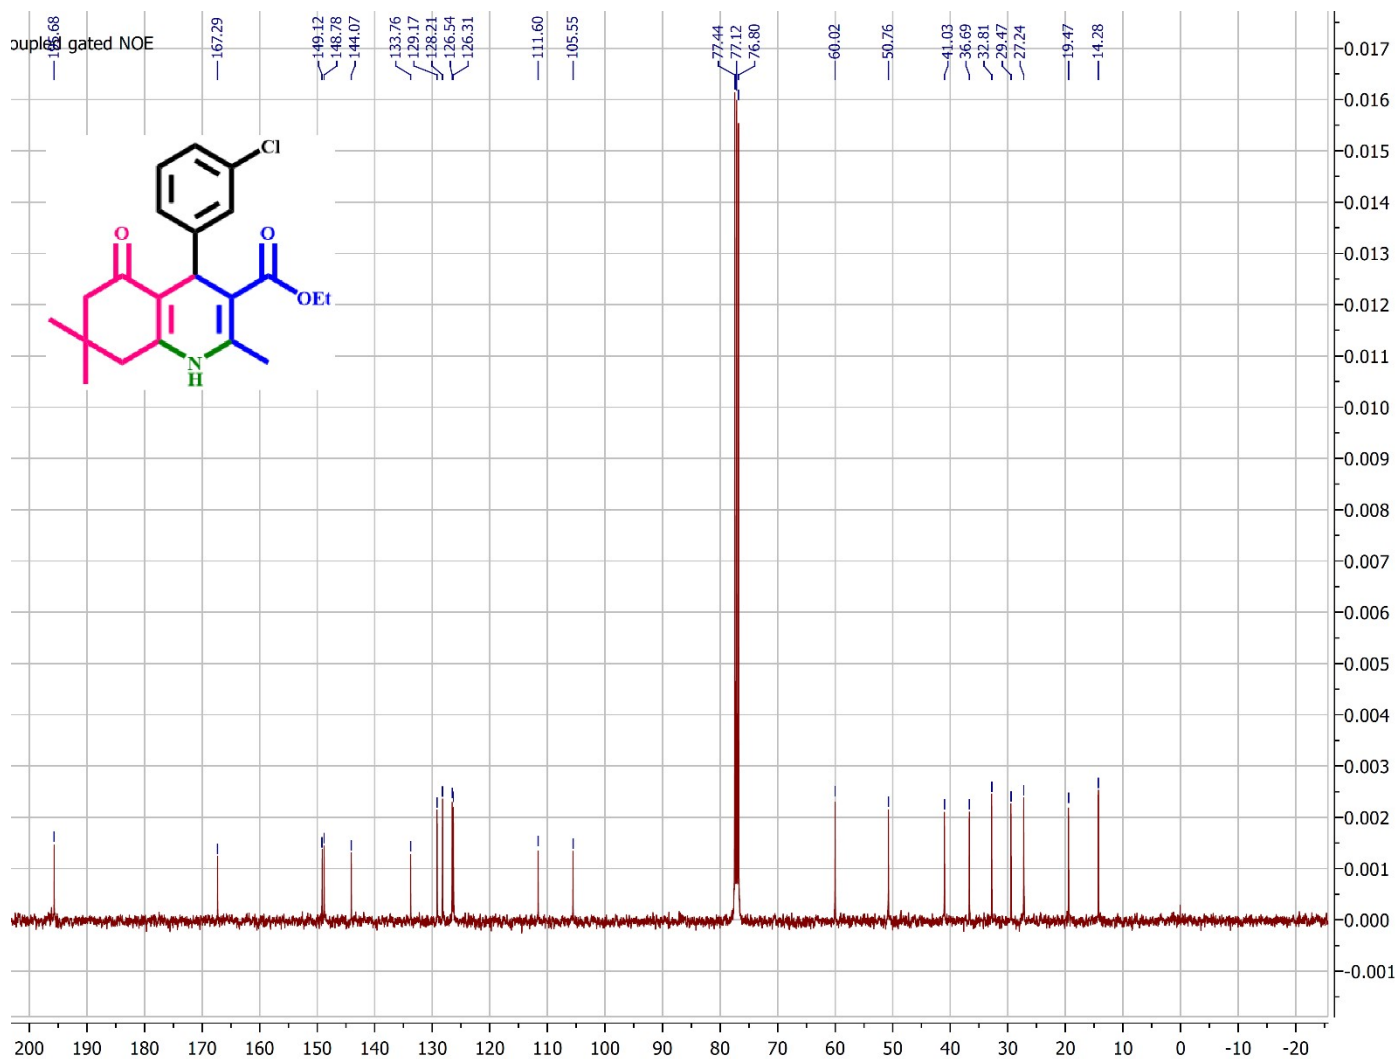

<sup>1</sup>H spectrum of Ethyl 4-(4-methylphenyl)-2,7,7-trimethyl-5-oxo-1,4,5,6,7,8-hexahydroquinoline-3-carboxylate (4g)

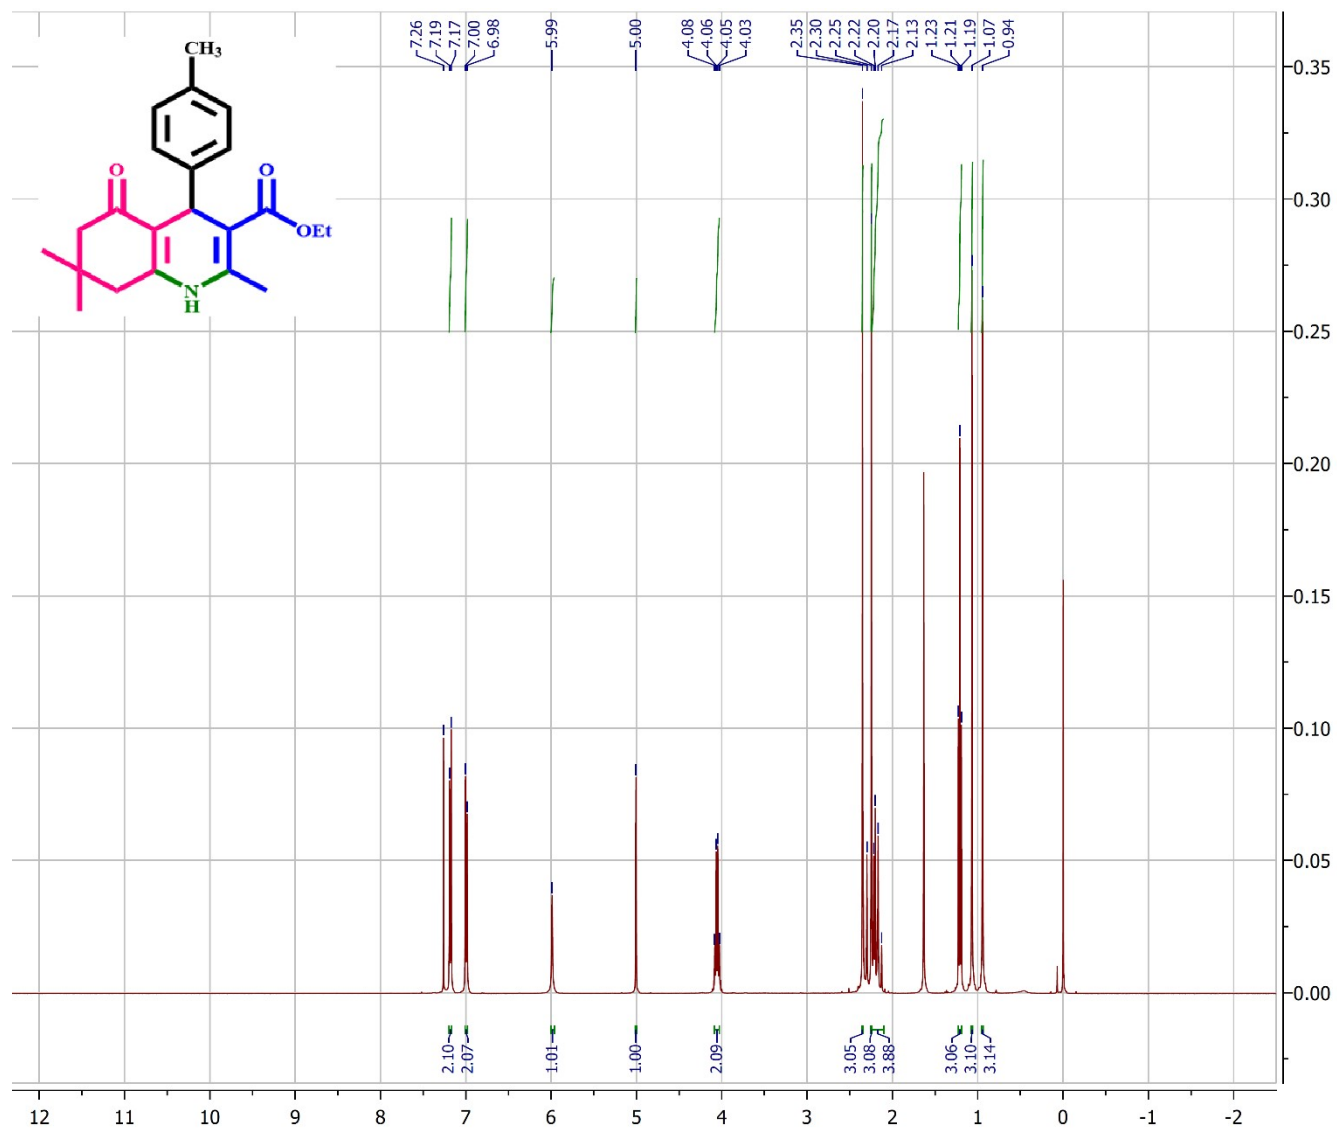

<sup>13</sup>C spectrum of Ethyl 4-(4-methylphenyl)-2,7,7-trimethyl-5-oxo-1,4,5,6,7,8-hexahydroquinoline-3-carboxylate (4g)

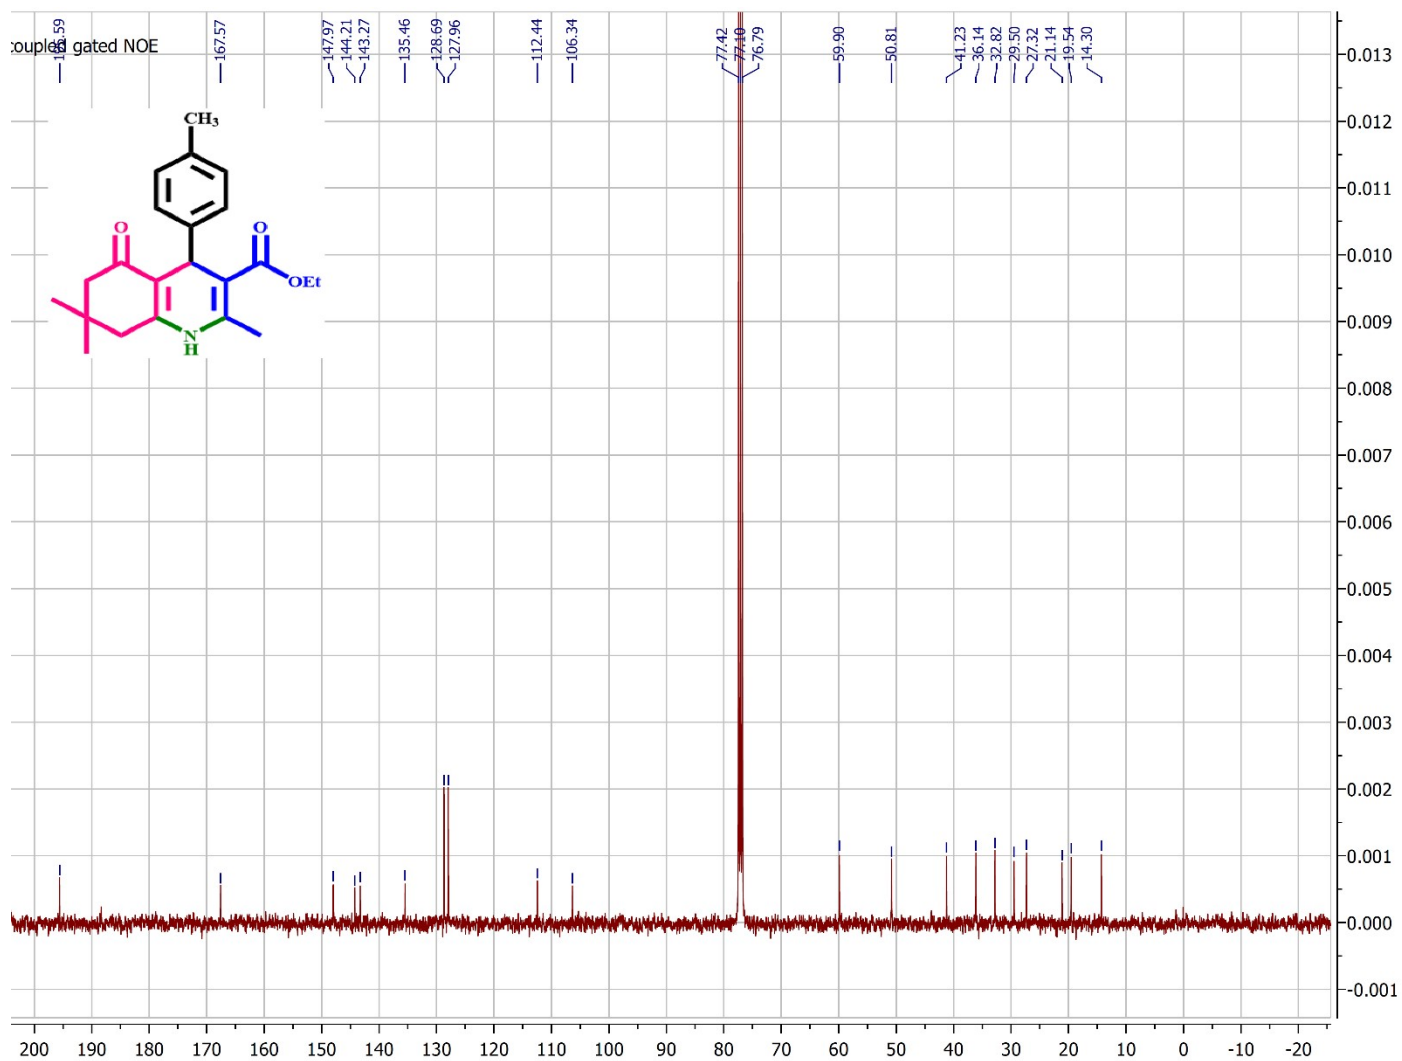

<sup>1</sup>H spectrum of Ethyl 4-(4-methoxyphenyl)-2,7,7-trimethyl-5-oxo-1,4,5,6,7,8-hexahydroquinoline-3-carboxylate (4h)

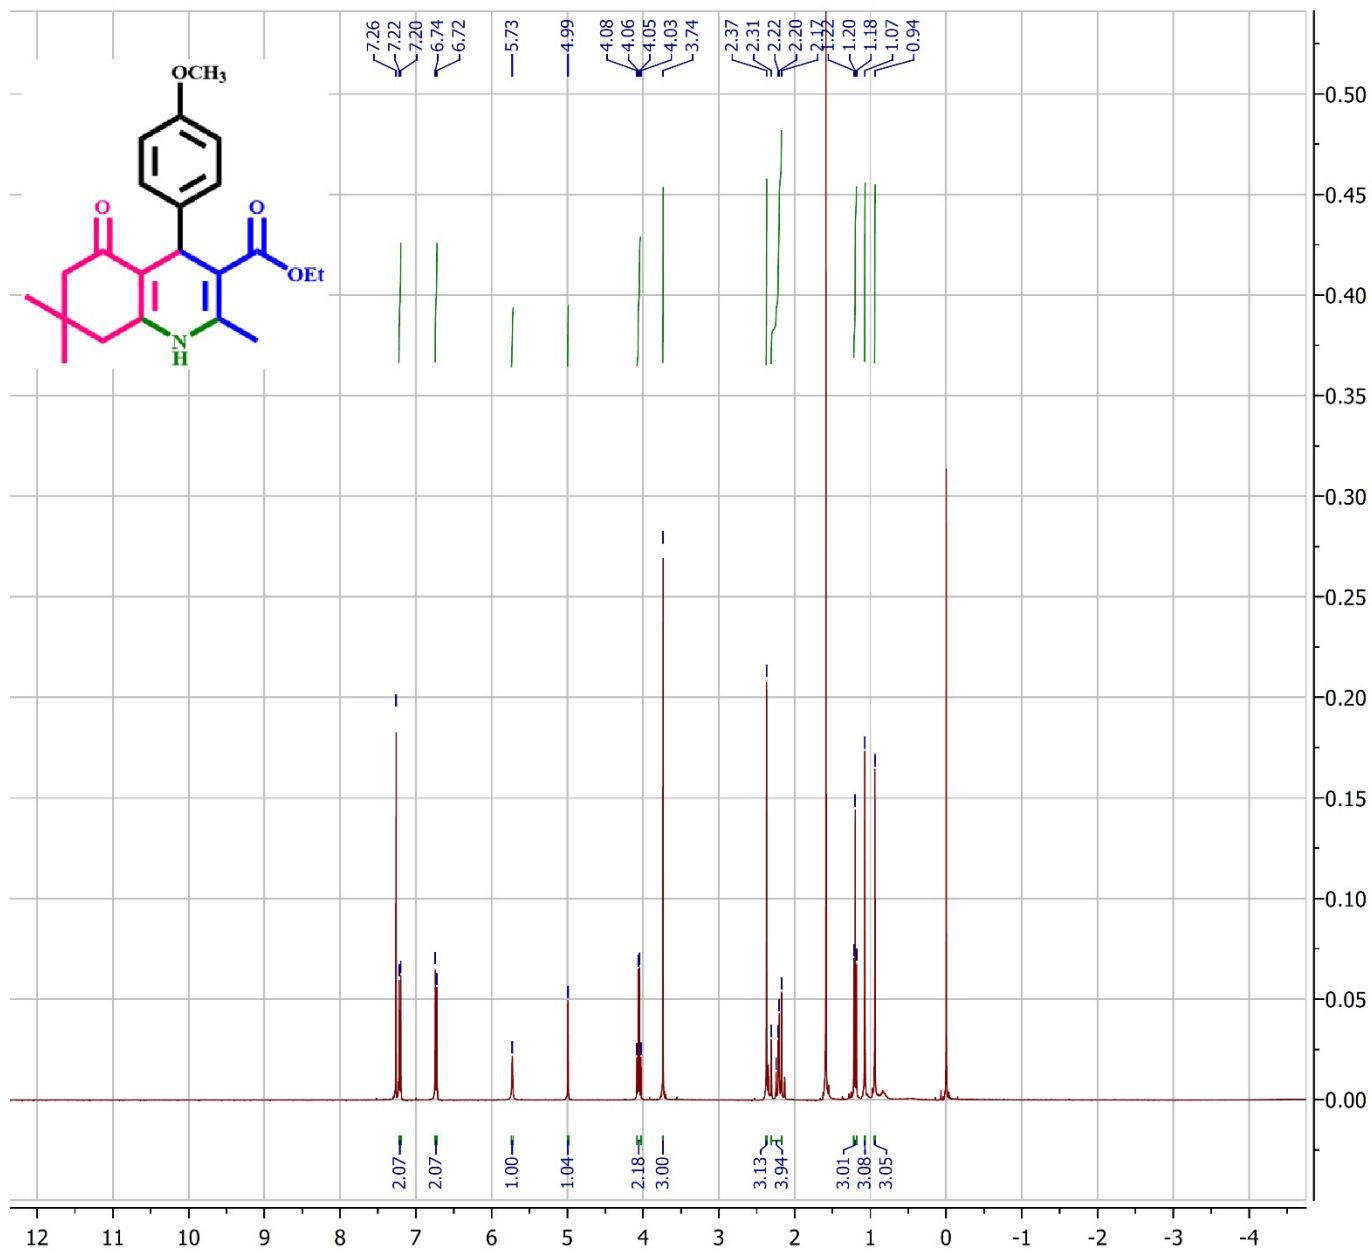

<sup>13</sup>C spectrum of Ethyl 4-(4-methoxyphenyl)-2,7,7-trimethyl-5-oxo-1,4,5,6,7,8-hexahydroquinoline-3-carboxylate (4h)

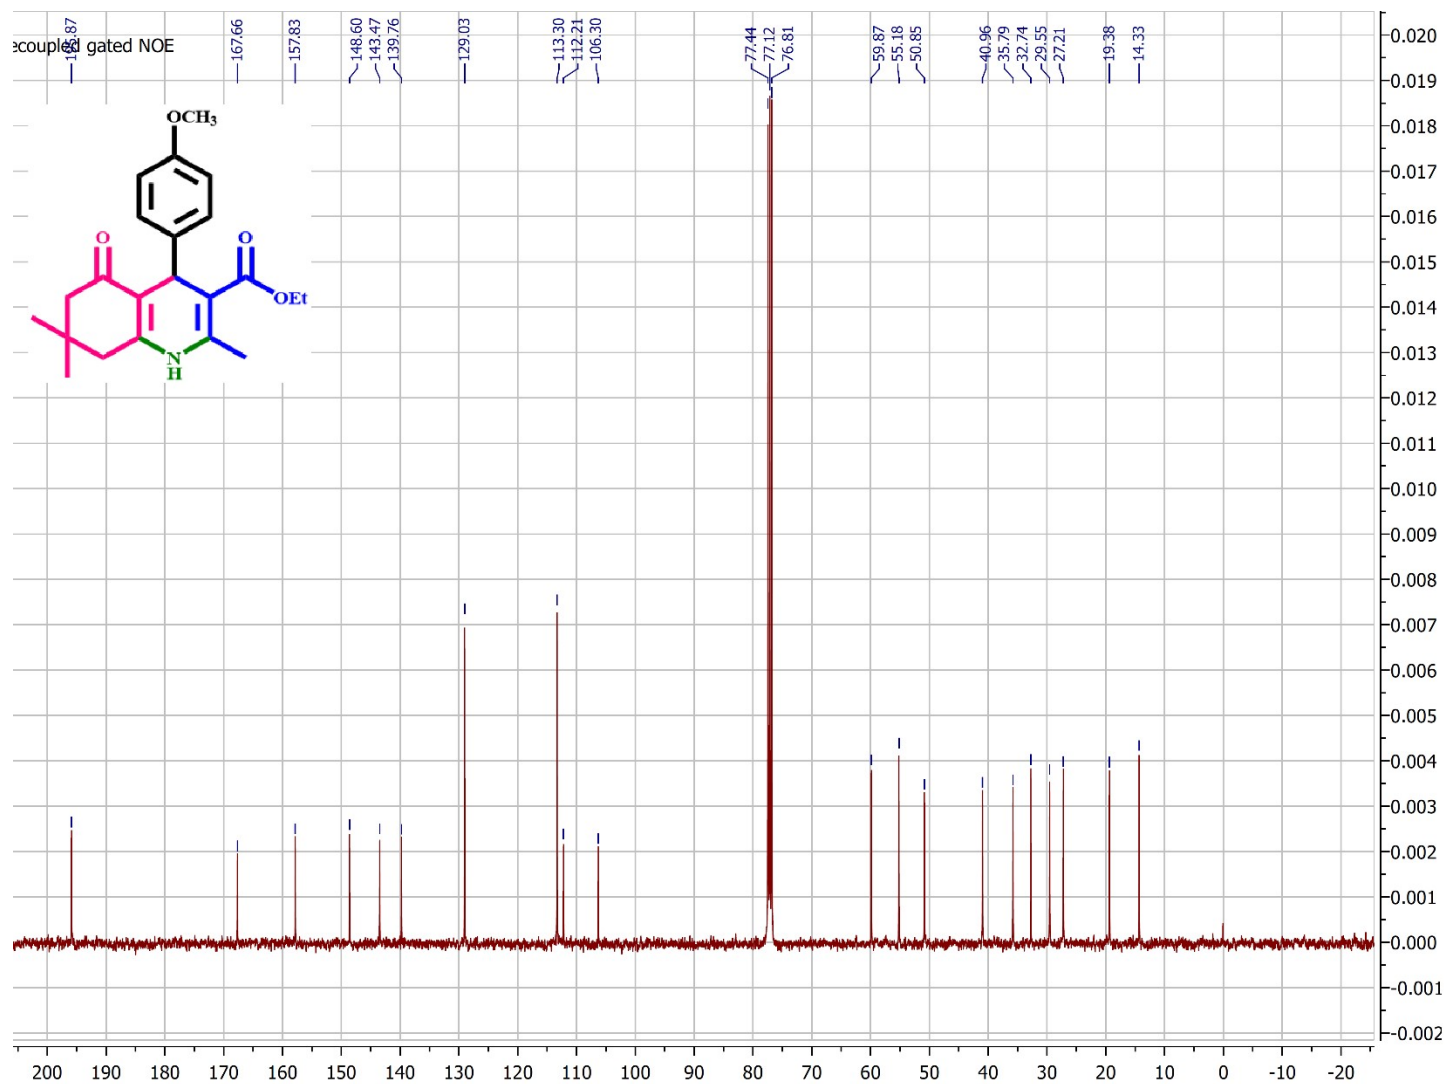

Supplement: d2re00246a1.pdf [file d2re00246a1.pdf]
